# Supplementary material
Source: PubMed Central journal article supplement (PMC3147450)
Supplement: supp_77_15_5445__1.pdf [file supp_77_15_5445__1.pdf]

TABLE S1. Operational Taxonomic Unit (OTU) determination, representative clone number, number of clones with percent of clone library, and phylogenetic grouping for the five clone libraries constructed for this study.

| Clone Library         | OTU | Sequenced clone no. | No. of clones (% of library) | Phylogenetic Grouping <sup>1</sup> |
|-----------------------|-----|---------------------|------------------------------|------------------------------------|
| PV-601_b18 (UHO)      | 1   | 6 & 16              | 18 (36.0)                    | Nitrospira                         |
|                       | 2   | 2 & 21              | 4 (8.0)                      | $\zeta$ - <i>Proteobacteria</i>    |
|                       | 3   | 150                 | 3 (6.0)                      | $\epsilon$ - <i>Proteobacteria</i> |
|                       | 4   | 158                 | 3 (6.0)                      | $\gamma$ - <i>Proteobacteria</i>   |
|                       | 5   | 202                 | 3 (6.0)                      | Chloroflexi                        |
|                       | 6   | 209                 | 2 (4.0)                      | $\epsilon$ - <i>Proteobacteria</i> |
|                       | 7   | 65                  | 2 (4.0)                      | $\epsilon$ - <i>Proteobacteria</i> |
|                       | 8   | 125                 | 2 (4.0)                      | $\epsilon$ - <i>Proteobacteria</i> |
|                       | 9   | 34                  | 2 (4.0)                      | Chloroflexi                        |
|                       | 16  | 139                 | 1 (2.0)                      | $\epsilon$ - <i>Proteobacteria</i> |
| PV-602_b14 (SPL)      | 1   | 10                  | 8 (16.0)                     | $\zeta$ - <i>Proteobacteria</i>    |
|                       | 2   | 25                  | 6 (12.0)                     | $\zeta$ - <i>Proteobacteria</i>    |
|                       | 3   | 216                 | 4 (8.0)                      | Flavobacteria                      |
|                       | 4   | 116                 | 4 (8.0)                      | $\alpha$ - <i>Proteobacteria</i>   |
|                       | 5   | 40                  | 3 (6.0)                      | Actinobacteria                     |
|                       | 6   | 17                  | 3 (6.0)                      | Chloroflexi                        |
|                       | 7   | 22                  | 3 (6.0)                      | $\zeta$ - <i>Proteobacteria</i>    |
|                       | 8   | 7                   | 3 (6.0)                      | $\delta$ - <i>Proteobacteria</i>   |
|                       | 9   | 5                   | 2 (4.0)                      | $\gamma$ - <i>Proteobacteria</i>   |
|                       | 10  | 28                  | 2 (4.0)                      | Nitrospira                         |
|                       | 11  | 31                  | 2 (4.0)                      | $\zeta$ - <i>Proteobacteria</i>    |
|                       | 12  | 69                  | 1 (2.0)                      | unclassified <i>Proteobacteria</i> |
| J2-308_redgreen (UNH) | 1   | 113                 | 14 (12.4)                    | Nitrospira                         |
|                       | 2   | 6                   | 10 (8.8)                     | unclassified Nitrospira            |
|                       | 3   | 77                  | 8 (7.1)                      | $\alpha$ - <i>Proteobacteria</i>   |
|                       | 4   | 22                  | 6 (5.3)                      | unclassified <i>Proteobacteria</i> |
|                       | 5   | 136                 | 6 (5.3)                      | $\delta$ - <i>Proteobacteria</i>   |
|                       | 6   | 30                  | 6 (5.3)                      | Chloroflexi                        |
|                       | 7   | 34                  | 6 (5.3)                      | Chloroflexi                        |
|                       | 8   | 110                 | 5 (4.4)                      | $\alpha$ - <i>Proteobacteria</i>   |
|                       | 9   | 141                 | 5 (4.4)                      | Actinobacteria                     |
|                       | 10  | 75                  | 4 (3.5)                      | Acidobacteria                      |
|                       | 11  | 114                 | 4 (3.5)                      | $\alpha$ - <i>Proteobacteria</i>   |
|                       | 12  | 27                  | 2 (1.8)                      | $\zeta$ - <i>Proteobacteria</i>    |
|                       | 13  | 95                  | 2 (1.8)                      | $\zeta$ - <i>Proteobacteria</i>    |
|                       | 14  | 118                 | 2 (1.8)                      | WS3                                |
|                       | 16  | 122                 | 2 (1.8)                      | $\zeta$ - <i>Proteobacteria</i>    |

(Continued on next page)

TABLE S1. Operational Taxonomic Unit (OTU) determination, representative clone number, number of clones with percent of clone library, and phylogenetic grouping for the five clone libraries constructed for this study. (*Continued*)

| Clone Library         | OTU                 | Sequenced clone no. | No. of clones (% of library) | Phylogenetic Grouping <sup>1</sup> |
|-----------------------|---------------------|---------------------|------------------------------|------------------------------------|
| J2-310_bluered (ULoh) | 1                   | 110                 | 23 (15.6)                    | Actinobacteria                     |
|                       | 2                   | 159                 | 9 (6.1)                      | WS3                                |
|                       | 3                   | 87                  | 9 (6.1)                      | unclassified <i>Proteobacteria</i> |
|                       | 4                   | 160                 | 8 (5.4)                      | $\delta$ - <i>Proteobacteria</i>   |
|                       | 5                   | 48                  | 7 (4.8)                      | $\delta$ - <i>Proteobacteria</i>   |
|                       | 6                   | 161                 | 6 (4.1)                      | unclassified Nitrospira            |
|                       | 7                   | 177                 | 6 (4.1)                      | $\delta$ - <i>Proteobacteria</i>   |
|                       | 8                   | 191                 | 8 (5.4)                      | $\zeta$ - <i>Proteobacteria</i>    |
|                       | 9                   | 187                 | 5 (3.4)                      | TM7                                |
|                       | 10                  | 123                 | 5 (3.4)                      | $\alpha$ - <i>Proteobacteria</i>   |
|                       | 11                  | 68                  | 4 (2.7)                      | $\delta$ - <i>Proteobacteria</i>   |
|                       | 12                  | 2                   | 3 (2.0)                      | Actinobacteria                     |
|                       | 13                  | 84                  | 3 (2.0)                      | unclassified Bacteria              |
|                       | 20                  | 55                  | 2 (1.4)                      | $\zeta$ - <i>Proteobacteria</i>    |
|                       | 22                  | 69                  | 2 (1.4)                      | $\zeta$ - <i>Proteobacteria</i>    |
|                       | 39                  | 94                  | 1 (0.7)                      | $\zeta$ - <i>Proteobacteria</i>    |
|                       | J2-373_scoop1 (Poh) | 1                   | 9, 67, & 74                  | 24 (28.6)                          |
| 2                     |                     | 12, 27, & 89        | 21 (25.0)                    | $\zeta$ - <i>Proteobacteria</i>    |
| 3                     |                     | 24                  | 7 (8.3)                      | Acidobacteria                      |
| 4                     |                     | 76                  | 4 (4.8)                      | $\gamma$ - <i>Proteobacteria</i>   |
| 5                     |                     | 48                  | 3 (3.6)                      | Acidobacteria                      |
| 6                     |                     | 78                  | 3 (3.6)                      | $\zeta$ - <i>Proteobacteria</i>    |
| 7                     |                     | 34                  | 3 (3.6)                      | $\zeta$ - <i>Proteobacteria</i>    |
| 8                     |                     | 10                  | 2 (2.4)                      | $\gamma$ - <i>Proteobacteria</i>   |
| 9                     |                     | 82                  | 2 (2.4)                      | $\gamma$ - <i>Proteobacteria</i>   |
| 10                    |                     | 1                   | 2 (2.4)                      | $\zeta$ - <i>Proteobacteria</i>    |
| 11                    |                     | 68                  | 2 (2.4)                      | $\zeta$ - <i>Proteobacteria</i>    |
| 13                    |                     | 3                   | 1 (1.2)                      | $\zeta$ - <i>Proteobacteria</i>    |
| 14                    |                     | 5                   | 1 (1.2)                      | $\zeta$ - <i>Proteobacteria</i>    |
| 15                    |                     | 52                  | 1 (1.2)                      | $\zeta$ - <i>Proteobacteria</i>    |
| 16                    |                     | 64                  | 1 (1.2)                      | $\zeta$ - <i>Proteobacteria</i>    |

<sup>1</sup>As determined by Ribosomal Database Project (RDP) release 10.22.
