# Supplementary material
Source: PubMed Central journal article supplement (PMC3147450)
Supplement: supp_77_15_5445__2.pdf [file supp_77_15_5445__2.pdf]

TABLE S2. Operational Taxonomic Unit (OTU) designations for the full-length *Zetaproteobacteria* dataset.

| OTU | Clone                              | Accession Number | Rep. no. clones | Region                    | Reference                     |
|-----|------------------------------------|------------------|-----------------|---------------------------|-------------------------------|
| 1   | Loh OTU2 clone 60                  | FJ001796         | 11              | Loihi Seamount            | Rassa <i>et al.</i> , 2009    |
| 1   | Poh OTU1 clone 9                   | JF320714         | 8               | Loihi Seamount            | This study                    |
| 1   | Poh OTU1 clone 67                  | JF320715         | 8               | Loihi Seamount            | This study                    |
| 1   | Poh OTU1 clone 74                  | JF320716         | 8               | Loihi Seamount            | This study                    |
| 1   | Poh OTU15 clone 52                 | JF320731         | 1               | Loihi Seamount            | This study                    |
| 1   | ULoh OTU20 clone 55                | JF320770         | 2               | Loihi Seamount            | This study                    |
| 1   | ULoh OTU39 clone 94                | JF320772         | 1               | Loihi Seamount            | This study                    |
| 1   | UNH OTU16 clone 122                | JF320787         | 2               | Loihi Seamount            | This study                    |
| 1   | V1F clone 151b                     | FJ905756         | 6               | Tonga Arc                 | Forget <i>et al.</i> , 2010   |
| 1   | AV19F clone 4b                     | FJ905617         | 17              | Tonga Arc                 | Forget <i>et al.</i> , 2010   |
| 1   | ELSC clone 13                      | FJ205309         | 1               | East Lau Spreading Center | GenBank; C. Dong, pers. comm. |
| 1   | Kermadec Arc clone TF-31           | FJ535254         | 1               | Kermadec Arc              | Hodges and Olson, 2009        |
| 1   | 1-WB OTU4 clone 29                 | EU574657         | 1               | Southern Mariana Trough   | Davis and Moyer, 2008         |
| 2   | PVB OTU4 clone 13                  | U15116           | 1               | Loihi Seamount            | Moyer <i>et al.</i> , 1995    |
| 2   | UHO OTU2 clone 21                  | JF320735         | 4               | Loihi Seamount            | This study                    |
| 2   | SPL OTU7 clone 22                  | JF320751         | 3               | Loihi Seamount            | This study                    |
| 2   | Loh OTU1 clone 67                  | FJ001795         | 12              | Loihi Seamount            | Rassa <i>et al.</i> , 2009    |
| 2   | Poh OTU2 clone 12                  | JF320717         | 7               | Loihi Seamount            | This study                    |
| 2   | Poh OTU2 clone 27                  | JF320718         | 7               | Loihi Seamount            | This study                    |
| 2   | Poh OTU2 clone 89                  | JF320719         | 7               | Loihi Seamount            | This study                    |
| 2   | ULoh OTU8 clone 191                | JF320764         | 8               | Loihi Seamount            | This study                    |
| 2   | UNH OTU13 clone 95                 | JF320785         | 2               | Loihi Seamount            | This study                    |
| 2   | Cleft Mound pushcore clone CMB-2   | DQ832638         | 2               | Juan de Fuca Ridge        | Davis <i>et al.</i> , 2009    |
| 2   | Vailulu'u Seamount clone VS_CL-318 | FJ497570         | 1               | Vailulu'u Seamount        | Sudek <i>et al.</i> , 2009    |
| 3   | Poh OTU16 clone 64                 | JF320732         | 1               | Loihi Seamount            | This study                    |
| 3   | Cleft Mound pushcore clone CMB-25  | DQ832637         | 3               | Juan de Fuca Ridge        | Davis <i>et al.</i> , 2009    |
| 3   | AV19F clone 45b                    | FJ905642         | 5               | Tonga Arc                 | Forget <i>et al.</i> , 2010   |
| 3   | V1F clone 2b                       | FJ905692         | 27              | Tonga Arc                 | Forget <i>et al.</i> , 2010   |
| 4   | Poh OTU6 clone 78                  | JF320723         | 3               | Loihi Seamount            | This study                    |
| 4   | Poh OTU7 clone 34                  | JF320724         | 3               | Loihi Seamount            | This study                    |
| 4   | Poh OTU13 clone 3                  | JF320729         | 1               | Loihi Seamount            | This study                    |
| 4   | Poh OTU14 clone 5                  | JF320730         | 1               | Loihi Seamount            | This study                    |
| 4   | V1F clone 118b                     | FJ905745         | 1               | Tonga Arc                 | Forget <i>et al.</i> , 2010   |
| 4   | V1F clone 7b                       | FJ905694         | 1               | Tonga Arc                 | Forget <i>et al.</i> , 2010   |
| 4   | V1F clone 25b                      | FJ905704         | 9               | Tonga Arc                 | Forget <i>et al.</i> , 2010   |
| 4   | ELSC clone 16                      | FJ205310         | 15              | East Lau Spreading Center | GenBank; C. Dong, pers. comm. |
| 5   | V1F clone 48b                      | FJ905712         | 12              | Tonga Arc                 | Forget <i>et al.</i> , 2010   |
| 6   | SPL OTU2 clone 25                  | JF320746         | 6               | Loihi Seamount            | This study                    |
| 6   | Loh OTU5 clone 26                  | FJ001799         | 3               | Loihi Seamount            | Rassa <i>et al.</i> , 2009    |
| 6   | Loh OTU5 clone 49                  | JF320713         | 2               | Loihi Seamount            | Rassa <i>et al.</i> , 2009    |
| 7   | SPL OTU1 clone 10                  | JF320745         | 8               | Loihi Seamount            | This study                    |
| 8   | 2-WB OTU10 clone 8                 | EU574670         | 5               | Southern Mariana Trough   | Davis and Moyer, 2008         |
| 8   | AV19F clone 30b                    | FJ905632         | 2               | Tonga Arc                 | Forget <i>et al.</i> , 2010   |
| 8   | ELSC clone 40                      | FJ205311         | 1               | East Lau Spreading Center | GenBank; C. Dong, pers. comm. |

(Continued on next page)

TABLE S2. Operational Taxonomic Unit (OTU) designations for the full-length *Zetaproteobacteria* dataset. (Continued)

| OTU | Clone                                         | Accession Number | Rep. no. clones | Region                    | Reference                                             |
|-----|-----------------------------------------------|------------------|-----------------|---------------------------|-------------------------------------------------------|
| 9   | Environmental enrichment JMM_S4-B-H2a         | HQ206658         | 1               | Maine                     | McBeth <i>et al.</i> , 2011                           |
| 9   | Cleft Mound pushcore clone CMB-6              | DQ832644         | 3               | Juan de Fuca Ridge        | Davis <i>et al.</i> , 2009                            |
| 9   | Papm3 clone BL26                              | AB284832         | 1               | Southern Mariana Trough   | Kato <i>et al.</i> , 2009b                            |
| 9   | Papm3 clone BL54                              | AB284833         | 1               | Southern Mariana Trough   | Kato <i>et al.</i> , 2009b                            |
| 9   | Vailulu'u Seamount clone VS_CL-111            | FJ497362         | 1               | Vailulu'u Seamount        | Sudek <i>et al.</i> , 2009                            |
| 9   | Vailulu'u Seamount clone VS_CL-407            | FJ497659         | 1               | Vailulu'u Seamount        | Sudek <i>et al.</i> , 2009                            |
| 10  | Poh OTU10 clone 1                             | JF320727         | 2               | Loihi Seamount            | This study                                            |
| 10  | Poh OTU11 clone 68                            | JF320728         | 2               | Loihi Seamount            | This study                                            |
| 10  | ULoh OTU22 clone 69                           | JF320771         | 2               | Loihi Seamount            | This study                                            |
| 10  | UNH OTU12 clone 27                            | JF320784         | 2               | Loihi Seamount            | This study                                            |
| 11  | <i>Mariprofundus ferrooxydans</i> strain JV-1 | EF493244         | 1               | Loihi Seamount            | Emerson and Moyer, 2002; Emerson <i>et al.</i> , 2007 |
| 11  | <i>Mariprofundus ferrooxydans</i> strain PV-1 | EF493243         | 1               | Loihi Seamount            | Emerson and Moyer, 2002; Emerson <i>et al.</i> , 2007 |
| 11  | <i>Mariprofundus</i> sp. strain M34           | JF317957         | 1               | Loihi Seamount            | This study                                            |
| 11  | Loh OTU7 clone 5                              | FJ001801         | 2               | Loihi Seamount            | Rassa <i>et al.</i> , 2009                            |
| 11  | SFB salt marsh sediment clone WSMO200         | GU291335         | 2               | California                | Moreau <i>et al.</i> , 2010                           |
| 12  | UNB OTU6 clone 31                             | JF261517         | 3               | Loihi Seamount            | Edwards <i>et al.</i> , 2011                          |
| 12  | UNB OTU8 clone 7                              | JF261519         | 2               | Loihi Seamount            | Edwards <i>et al.</i> , 2011                          |
| 13  | V1F clone 74b                                 | FJ905724         | 5               | Tonga Arc                 | Forget <i>et al.</i> , 2010                           |
| 14  | Red Sea bacterium KT-2K34                     | AJ309526         | 1               | Red Sea                   | Eder <i>et al.</i> , 2001                             |
| 14  | UNB OTU7 clone 44                             | JF261518         | 3               | Loihi Seamount            | Edwards <i>et al.</i> , 2011                          |
| 15  | Papm3 clone BL17                              | AB284830         | 1               | Southern Mariana Trough   | Kato <i>et al.</i> , 2009b                            |
| 15  | Papm3 clone BL58                              | AB284834         | 1               | Southern Mariana Trough   | Kato <i>et al.</i> , 2009b                            |
| 15  | Papm3 clone BL23                              | AB284831         | 1               | Southern Mariana Trough   | Kato <i>et al.</i> , 2009b                            |
| 16  | AV19F clone 42b                               | FJ905640         | 2               | Tonga Arc                 | Forget <i>et al.</i> , 2010                           |
| 16  | V1F clone 105b                                | FJ905738         | 1               | Tonga Arc                 | Forget <i>et al.</i> , 2010                           |
| 17  | ELSC clone 100                                | FJ205312         | 3               | East Lau Spreading Center | GenBank; C. Dong, pers. comm.                         |
| 18  | Laboratory enrichment JMM_Dock-D2b-C6         | HQ206656         | 1               | Maine                     | McBeth <i>et al.</i> , 2011                           |
| 18  | Laboratory enrichment JMM_S1-C-H1a            | HQ206657         | 1               | Maine                     | McBeth <i>et al.</i> , 2011                           |
| 19  | SPL OTU11 clone 31                            | JF320755         | 2               | Loihi Seamount            | This study                                            |
| 20  | 2-WB OTU8 clone 7                             | EU574668         | 2               | Southern Mariana Trough   | Davis and Moyer, 2008                                 |
| 21  | AV19F clone 13b                               | FJ905621         | 1               | Tonga Arc                 | Forget <i>et al.</i> , 2010                           |
| 21  | V1F clone 125b                                | FJ905748         | 1               | Tonga Arc                 | Forget <i>et al.</i> , 2010                           |
| 22  | PV-549_X2 clone P9X2b7H12                     | EU491223         | 1               | Loihi Seamount            | Santelli <i>et al.</i> , 2008                         |
| 22  | PV-549_X2 clone P9X2b8F02                     | EU491311         | 1               | Loihi Seamount            | Santelli <i>et al.</i> , 2008                         |
| 23  | <i>Mariprofundus</i> sp. strain GSB2          | HQ206653         | 1               | Maine                     | McBeth <i>et al.</i> , 2011                           |
| 24  | Guaymas Core B clone B03R022                  | AY197408         | 1               | Guaymas                   | Dhillon <i>et al.</i> , 2003                          |
| 25  | AV19F clone 106b                              | FJ905673         | 1               | Tonga Arc                 | Forget <i>et al.</i> , 2010                           |
| 26  | Kermadec Arc clone CF-30                      | FJ535293         | 1               | Kermadec Arc              | Hodges and Olson, 2009                                |
| 27  | Kermadec Arc clone TS-20                      | FJ535342         | 1               | Kermadec Arc              | Hodges and Olson, 2009                                |
| 28  | Vailulu'u Seamount clone VS_CL-152            | FJ497401         | 1               | Vailulu'u Seamount        | Sudek <i>et al.</i> , 2009                            |
