# Supplementary material
Source: PubMed Central journal article supplement (PMC3147450)
Supplement: supp_77_15_5445__3.pdf [file supp_77_15_5445__3.pdf]

TABLE S3. Clone library environmental data, including pH and geochemical concentrations and ratios.

| Year Collected               | Clone Library                        | Region                      | pH       | Fe (μM)   | Mn (μM)    | Fe/Mn (mol ratio) | Si (μM)    | Reference                                                     |
|------------------------------|--------------------------------------|-----------------------------|----------|-----------|------------|-------------------|------------|---------------------------------------------------------------|
| <b>Full-Length Sequences</b> |                                      |                             |          |           |            |                   |            |                                                               |
| 1991                         | Pele's Vents Bacteria (PVB)          | Loihi Seamount              | 4.2-5.5† | 603-1460† | 20.6-48.4† | ~47.9†            | ~667-1770† | Karl <i>et al.</i> , 1988; Sedwick <i>et al.</i> , 1992, 1994 |
| 1996                         | <i>M. ferrooxydans</i> strain PV-1   | Loihi Seamount              | 6.5-7.6  | 270-664   | 4.6-11.9   | 55.9-59.1         | 661-1480   | Wheat <i>et al.</i> , 2000                                    |
| 1998                         | <i>M. ferrooxydans</i> strain JV-1   | Loihi Seamount              | 5.3      | 67        | 59.1       | 1.1               | 2490       | Wheat <i>et al.</i> , 2000                                    |
| 2003                         | PV-549_X2                            | Loihi Seamount              |          |           |            |                   |            |                                                               |
| 2004                         | PV-601_b18 (UHO)                     | Loihi Seamount              | 5.9-6.0  | 261-452   | 11.0-19.1  | 22.9-23.7         | 2206-3810  | Wheat <i>et al.</i> , 2000                                    |
| 2004                         | PV-602_b14 (SPL)                     | Loihi Seamount              | 6.1      | 476       | 8.9        | 53.2              | 3892       | Wheat <i>et al.</i> , 2000                                    |
| 2006                         | <i>Mariprofundus</i> sp. strain M34  | Loihi Seamount              | 6.0      | 610       | 17.0       | 35.9              | 4226       | Glazer and Rouxel, 2009                                       |
| 2006                         | Growth Chamber LoBT_24 (Loh)         | Loihi Seamount              | 5.9      | 235       | 21.8       | 10.8              | 1558       | Glazer and Rouxel, 2009                                       |
| 2006                         | Ula Nui Bacteria (UNB)               | Loihi Seamount              |          |           |            |                   |            |                                                               |
| 2007                         | J2-308_redgreen (UNH)                | Loihi Seamount              | 6.7-6.8  | 576-578   | 24.1-24.5  | 23.6-23.9         | 4069-4131  | Glazer and Rouxel, 2009                                       |
| 2007                         | J2-310_bluered (ULoh)                | Loihi Seamount              |          |           |            |                   |            |                                                               |
| 2008                         | J2-373_scoop1 (Poh)                  | Loihi Seamount              | 5.6-6.5  | 507-773   | 12.4-19.0  | 40.7-40.9         | 1553-2275  | Glazer and Rouxel, 2009                                       |
| 1997                         | Red Sea KT-2                         | Red Sea                     | 6.5      |           |            |                   |            | Eder <i>et al.</i> , 2001                                     |
| 1998                         | Guaymas Core B                       | Southern Guaymas vent field |          |           |            |                   |            |                                                               |
| 2002                         | Cleft Mound pushcore 23              | Juan de Fuca Ridge          | 7.5      | 0.94      | 9.7        | 0.097             | 241        | Davis <i>et al.</i> , 2009                                    |
| 2003                         | WSMO200                              | California                  | 1.8      |           |            |                   |            | Moreau <i>et al.</i> , 2010                                   |
| 2003                         | 1-WB                                 | Southern Mariana Trough     |          |           |            |                   |            |                                                               |
| 2003                         | 2-WB                                 | Southern Mariana Trough     |          |           |            |                   |            |                                                               |
| 2004                         | Papm3                                | Southern Mariana Trough     | 7.3      |           |            |                   |            | Kato <i>et al.</i> , 2009b                                    |
| 2005                         | Tangaroa Flocc (TF)                  | Kermadec Arc                | ~5       | 6         |            |                   |            | Hodges and Olson, 2009                                        |
| 2005                         | Tangaroa Sediment (TS)               | Kermadec Arc                | ~5       | 6         |            |                   |            | Hodges and Olson, 2009                                        |
| 2005                         | Clark Flocc (CF)                     | Kermadec Arc                | ~5       | 15        |            |                   |            | Hodges and Olson, 2009                                        |
| 2005                         | Vailulu'u Seamount (VS_CL)           | Vailulu'u Seamount          | 7.5-8.4  |           |            |                   |            | Sudek <i>et al.</i> , 2009                                    |
| 2007                         | East Lau Spreading Center (ELSC)     | ELSC                        |          |           |            |                   |            |                                                               |
| 2007                         | R1053 (V1F)                          | Tonga Arc                   |          |           |            |                   |            |                                                               |
| 2007                         | R1046 (AV19F)                        | Tonga Arc                   |          |           |            |                   |            |                                                               |
| 2008                         | <i>Mariprofundus</i> sp. strain GSB2 | Maine                       | 6.2      |           |            |                   |            | McBeth <i>et al.</i> , 2011                                   |
| 2009/10                      | Bigelow Enrichment Experiments       | Maine                       |          |           |            |                   |            |                                                               |

† Averaged from samples from 1987-1992; data not used in analyses.
