# Supplementary material
Source: PubMed Central journal article supplement (PMC3147450)
Supplement: supp_77_15_5445__4.pdf [file supp_77_15_5445__4.pdf]

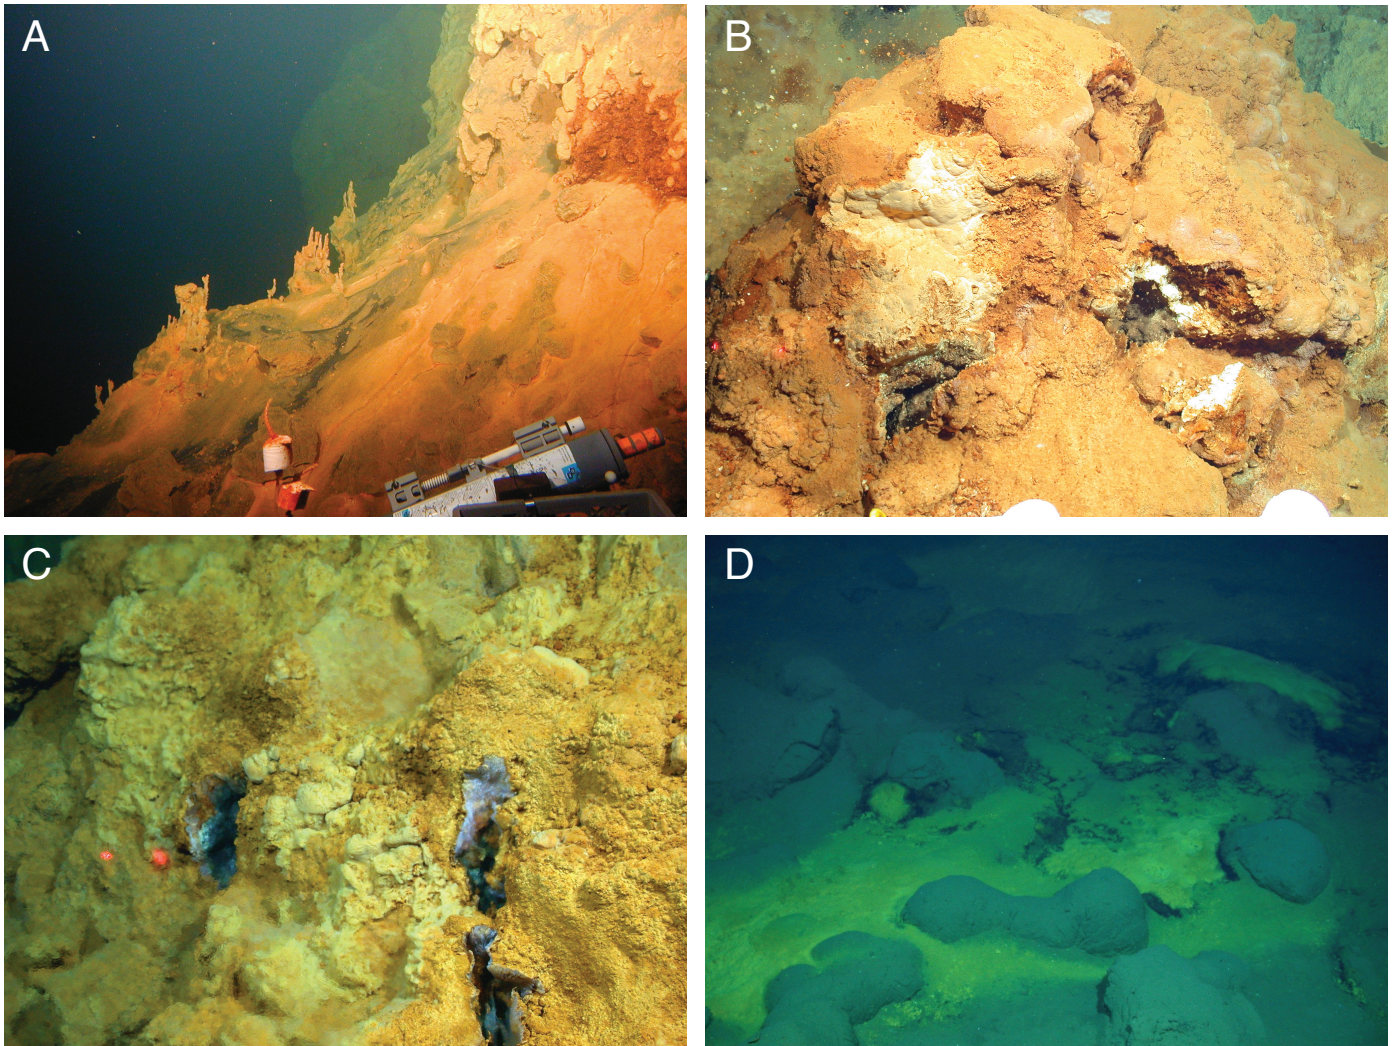

FIG. S1. Iron-oxide encrusted mats from selected sampling sites at Loihi Seamount. A) Hiolo Ridge chimlets (Upper Mkr #48). B) Pohaku (Mkr #57). C) Upper North Hiolo (Mkr #39). D) Diffuse venting at Ula Nui (FeMO Deep Site). The distance between red laser points represents 10 cm.
