# Supplementary material
Source: PubMed Central journal article supplement (PMC3147450)
Supplement: supp_77_15_5445__7.pdf [file supp_77_15_5445__7.pdf]

## *Supplemental References*

1. **Davis, R. E., and C. L. Moyer.** 2008. Extreme spatial and temporal variability of hydrothermal microbial mat communities along the Mariana Island Arc and southern Mariana back-arc system. *J. Geophys. Res.* **113**:B08S15. doi:10.1029/2007JB005413.
2. **Davis, R. E., D. S. Stakes, C. G. Wheat, and C. L. Moyer.** 2009. Bacterial variability within an iron-silica-manganese-rich hydrothermal mound located off-axis at the Cleft Segment, Juan de Fuca Ridge. *Geomicrobiol. J.* **26**:570-580.
3. **Dhillon, A., A. Teske, J. Dillon, D. A. Stahl, and M. L. Sogin.** 2003. Molecular characterization of sulfate-reducing bacteria in the Guaymas Basin. *Appl. Environ. Microbiol.* **69**:2765-2772.
4. **Eder, W., L. L. Jahnke, M. Schmidt, and R. Huber.** 2001. Microbial diversity of the brine-seawater interface of the Kebrit Deep, Red Sea, studied via 16S rRNA gene sequences and cultivation methods. *Appl. Environ. Microbiol.* **67**:3077-3085.
5. **Edwards, K. J., B. T. Glazer, O. J. Rouxel, W. Bach, D. Emerson, R. E. Davis, B. M. Toner, C. S. Chan, B. M. Tebo, H. Staudigel, and C. L. Moyer.** May 2011, posting date. Ultra-diffuse hydrothermal venting supports Fe-oxidizing bacteria and massive uranium deposition at 5000 m off Hawaii. *ISME J.* doi:10.1038/ismej.2011.48.
6. **Emerson, D., and C. L. Moyer.** 2002. Neutrophilic Fe-oxidizing bacteria are abundant at the Loihi Seamount hydrothermal vents and play a major role in Fe oxide deposition. *Appl. Environ. Microbiol.* **68**:3085-3093.
7. **Emerson, D., J. A. Rentz, T. G. Lilburn, R. E. Davis, H. Aldrich, C. Chan, and C. L. Moyer.** 2007. A novel lineage of *Proteobacteria* involved in formation of marine Fe-oxidizing microbial mat communities. *PLoS ONE* **2**:e667. doi:10.1371/journal.pone.0000667.
8. **Forget, N. L., S. A. Murdock, and S. K. Juniper.** 2010. Bacterial diversity in Fe-rich hydrothermal sediments at two South Tonga Arc submarine volcanoes. *Geobiology* **8**:417-432. doi:10.1111/j.1472-4669.2010.00247.x.
9. **Glazer, B. T., and O. J. Rouxel.** 2009. Redox speciation and distribution within diverse iron-dominated microbial habitats at Loihi Seamount. *Geomicrobiol. J.* **26**:606-622.
10. **Hodges, T. W., and J. B. Olson.** 2009. Molecular comparison of bacterial communities within iron-containing flocculent mats associated with submarine volcanoes along the Kermadec Arc. *Appl. Environ. Microbiol.* **75**:1650-1657.
11. **Karl, D. M., G. M. McMurtry, A. Malahoff, and M. O. Garcia.** 1988. Loihi Seamount, Hawaii: a mid-plate volcano with a distinctive hydrothermal system. *Nature* **335**:532-535.

12. **Kato, S., K. Yanagawa, M. Sunamura, Y. Takano, J. Ishibashi, T. Kakegawa, M. Utsumi, T. Yamanaka, T. Toki, T. Noguchi, K. Kobayashi, A. Moroi, H. Kimura, Y. Kawarabayasi, K. Marumo, T. Urabe, and A. Yamagishi.** 2009b. Abundance of *Zetaproteobacteria* within crustal fluids in back-arc hydrothermal fields of the Southern Mariana Trough. *Environ. Microbiol.* **11**:3210-3222.
13. **McBeth, J. M., B. J. Little, R. I. Ray, K. M. Farrar, and D. Emerson.** 2011. Neutrophilic iron-oxidizing “*Zetaproteobacteria*” and mild steel corrosion in nearshore marine environments. *Appl. Environ. Microbiol.* **77**:1405-1412.
14. **Moyer, C. L., F. C. Dobbs, and D. M. Karl.** 1995. Phylogenetic diversity of the bacterial community from a microbial mat at an active, hydrothermal vent system, Loihi Seamount, Hawaii. *Appl. Environ. Microbiol.* **61**:1555-1562.
15. **Rassa, A. C., S. M. McAllister, S. A. Safran, and C. L. Moyer.** 2009. *Zeta-Proteobacteria* dominate the colonization and formation of microbial mats in low-temperature hydrothermal vents at Loihi Seamount, Hawaii. *Geomicrobiol. J.* **26**:623-638.
16. **Santelli, C. M., B. N. Orcutt, E. Banning, W. Bach, C. L. Moyer, M. L. Sogin, H. Staudigel, and K. J. Edwards.** 2008. Abundance and diversity of microbial life in ocean crust. *Nature* **453**:653-656.
17. **Sedwick, P. N., G. M. McMurtry, D. R. Hilton, and F. Goff.** 1994. Carbon dioxide and helium in hydrothermal fluids from Loihi Seamount, Hawaii, USA: temporal variability and implications for the release of mantle volatiles. *Geochim. Cosmochim. Acta* **58**:1219-1227.
18. **Sedwick, P. N., G. M. McMurtry, and J. D. Macdougall.** 1992. Chemistry of hydrothermal solutions from Pele’s Vents, Loihi Seamount, Hawaii. *Geochim. Cosmochim. Acta* **56**:3643-3667.
19. **Sudek, L. A., A. S. Templeton, B. M. Tebo, and H. Staudigel.** 2009. Microbial ecology of Fe (hydr)oxide mats and basaltic rock from Vailulu’u Seamount, American Samoa. *Geomicrobiol. J.* **26**:581-596.
20. **Wheat, C. G., H. W. Jannasch, J. N. Plant, C. L. Moyer, F. J. Sansone, and G. M. McMurtry.** 2000. Continuous sampling of hydrothermal fluids from Loihi Seamount after the 1996 event. *J. Geophys. Res.* **105**:19353-19367.
